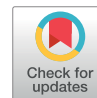

# Erratum

**Erratum. Increased Risk of Fracture and Postfracture Adverse Events in Patients With Diabetes: Two Nationwide Population-Based Retrospective Cohort Studies. *Diabetes Care* 2014;37:2246–2252**

<https://doi.org/10.2337/dc17-er08c>

*Chien-Chang Liao, Chao-Shun Lin,  
Chun-Chuan Shih, Chun-Chieh Yeh,  
Yi-Cheng Chang, Yuan-Wen Lee, and  
Ta-Liang Chen*

In the article cited above, the third affiliation was corrected to read “Department of Anesthesiology, School of Medicine, College of Medicine, Taipei Medical University, Taipei, Taiwan.” Additionally, the affiliations for author Yuan-Wen Lee were updated to include affiliations 2 and 3.

The online version has been corrected to reflect this change.
